# Supplementary figures and images for: Resilient Biomedical Systems Design Under Noise Using Logic-Based Machine Learning
Source: Frontiers journal article supplement (doi:10.3389/fcteg.2021.778118), 2022-04-08

# 1st and 2nd PCA eigenvalues

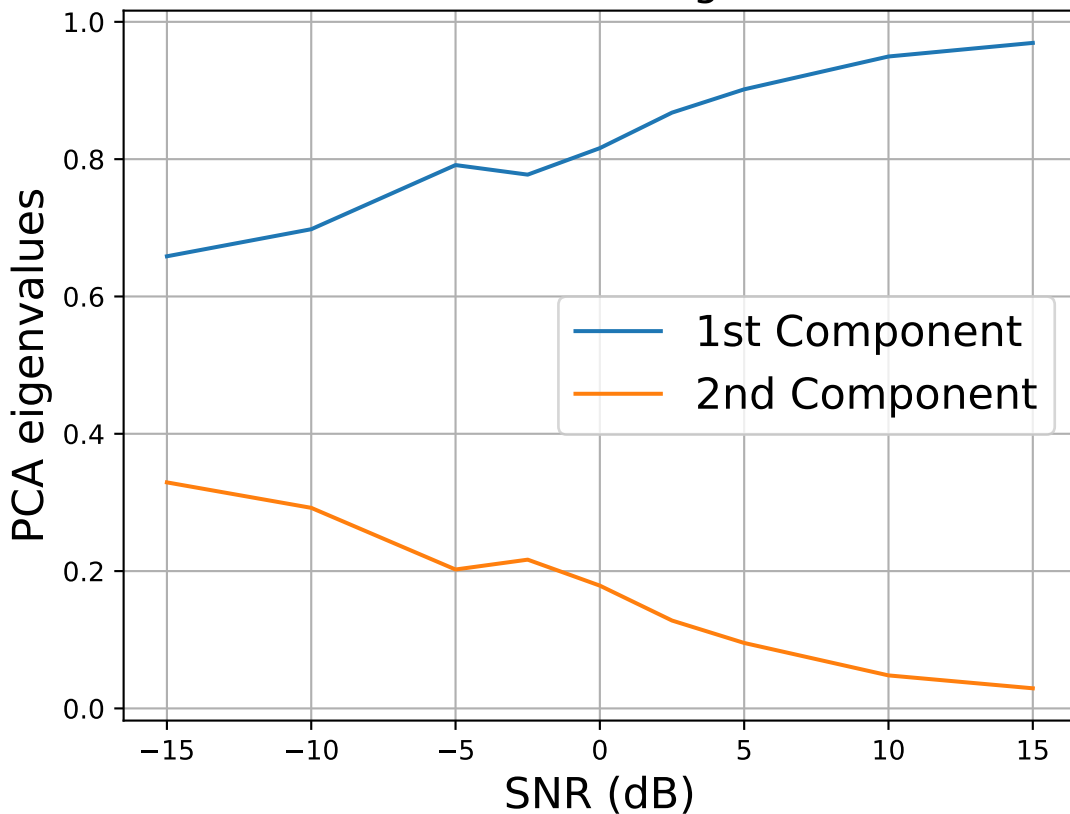

Supplement: Data_Sheet_1.zip [file All_data_PCA.pdf › Supplementary_Figures/All_data_PCA.pdf]

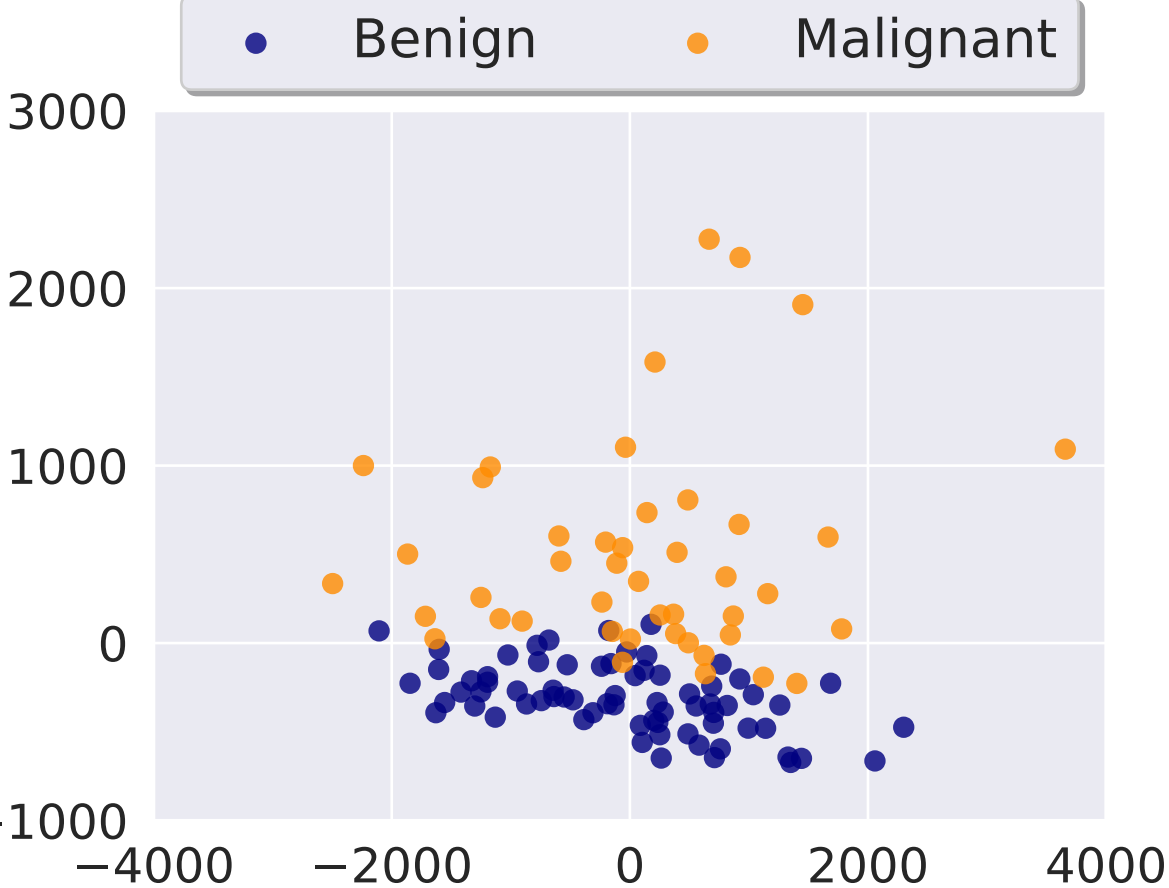

Supplement: Data_Sheet_1.zip [file PCA_selected_cols_-10dB.pdf › Supplementary_Figures/PCA_selected_cols_-10dB.pdf]

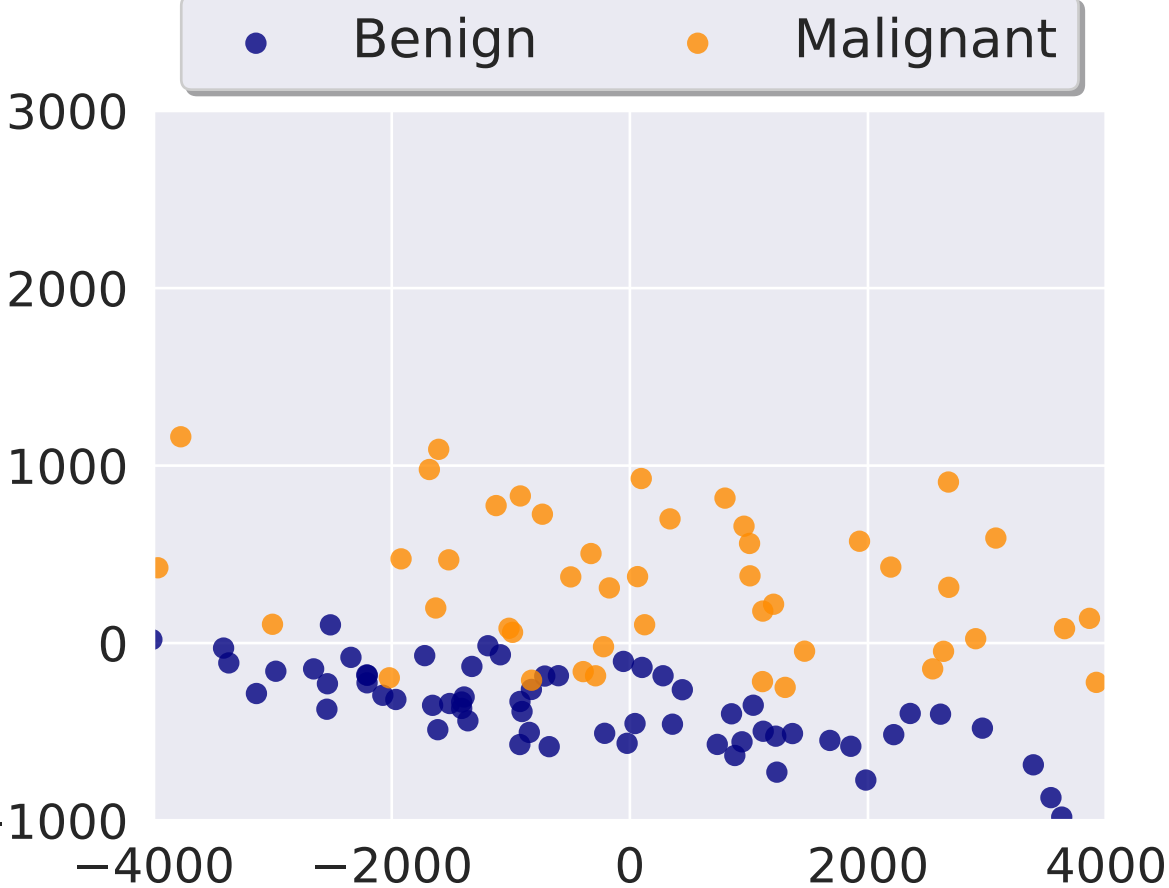

Supplement: Data_Sheet_1.zip [file PCA_selected_cols_-15dB.pdf › Supplementary_Figures/PCA_selected_cols_-15dB.pdf]

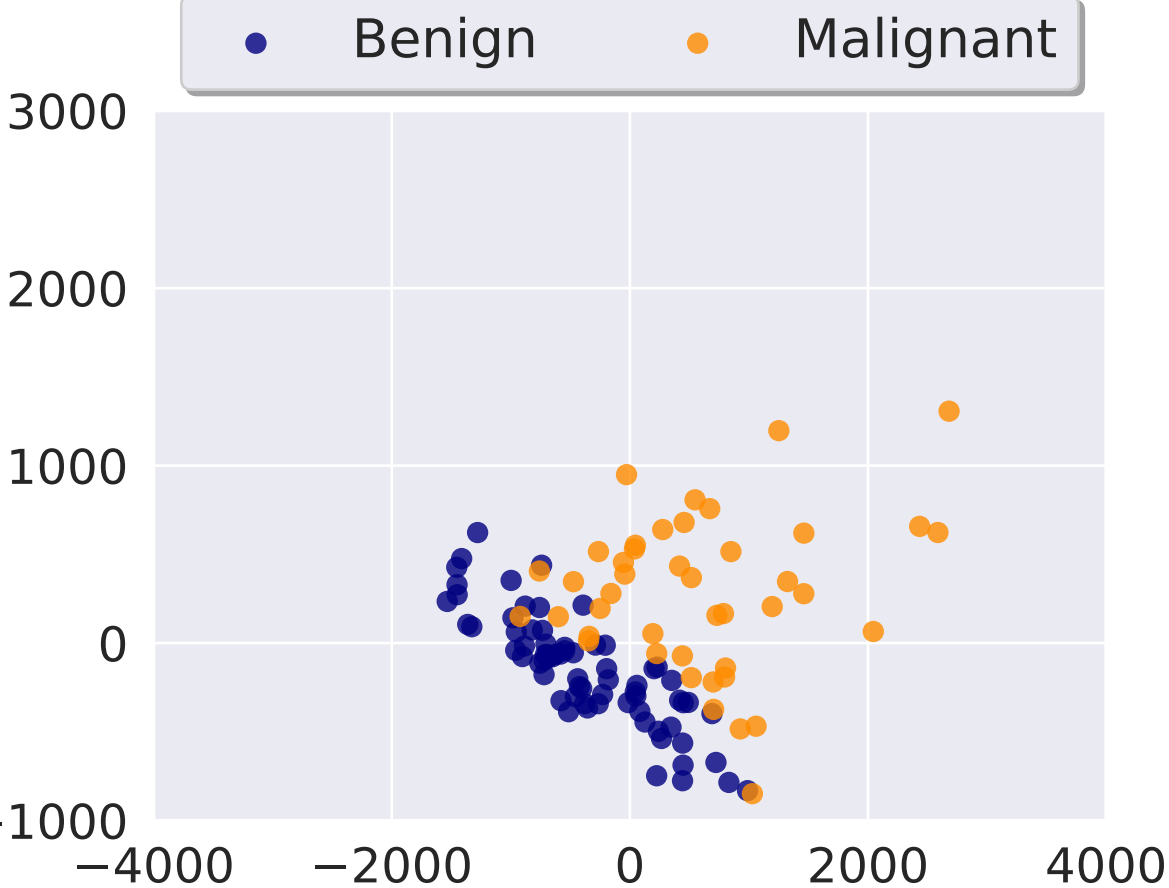

Supplement: Data_Sheet_1.zip [file PCA_selected_cols_-5dB.pdf › Supplementary_Figures/PCA_selected_cols_-5dB.pdf]

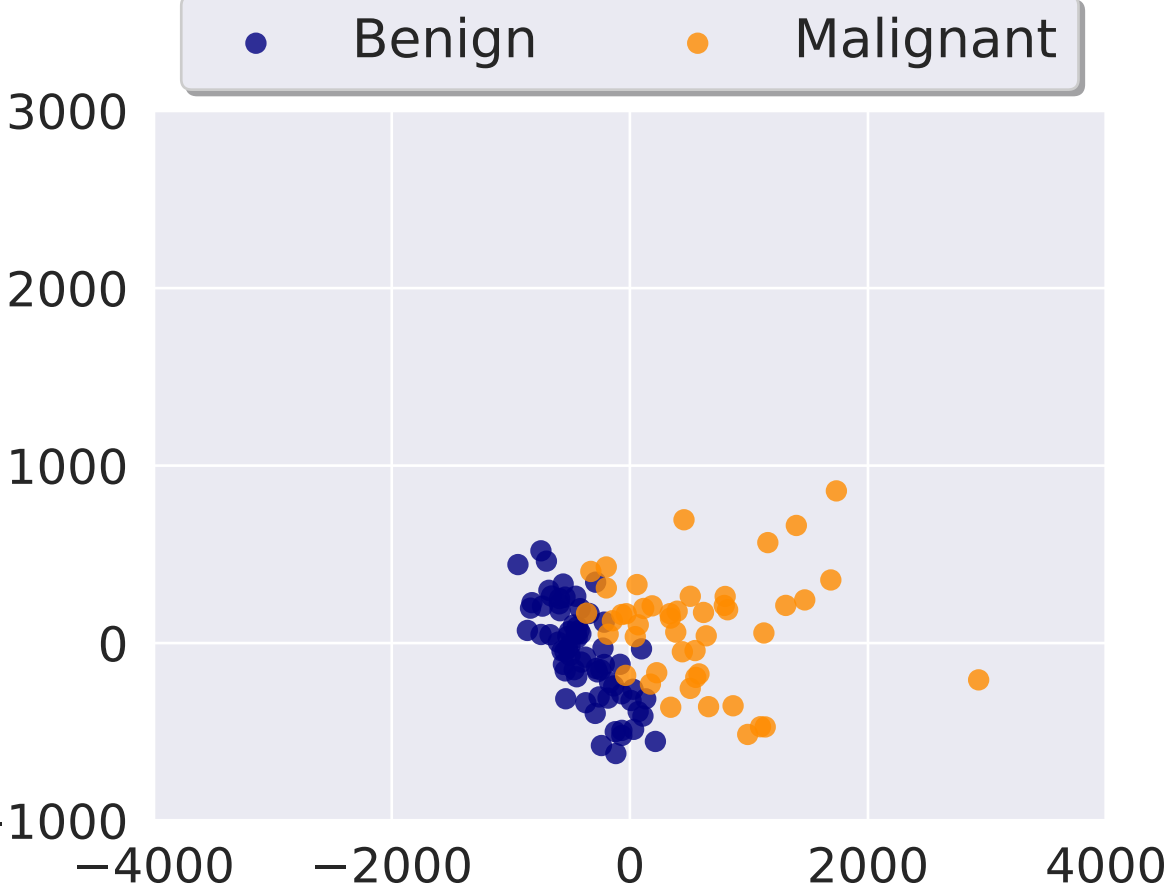

Supplement: Data_Sheet_1.zip [file PCA_selected_cols_0dB.pdf › Supplementary_Figures/PCA_selected_cols_0dB.pdf]

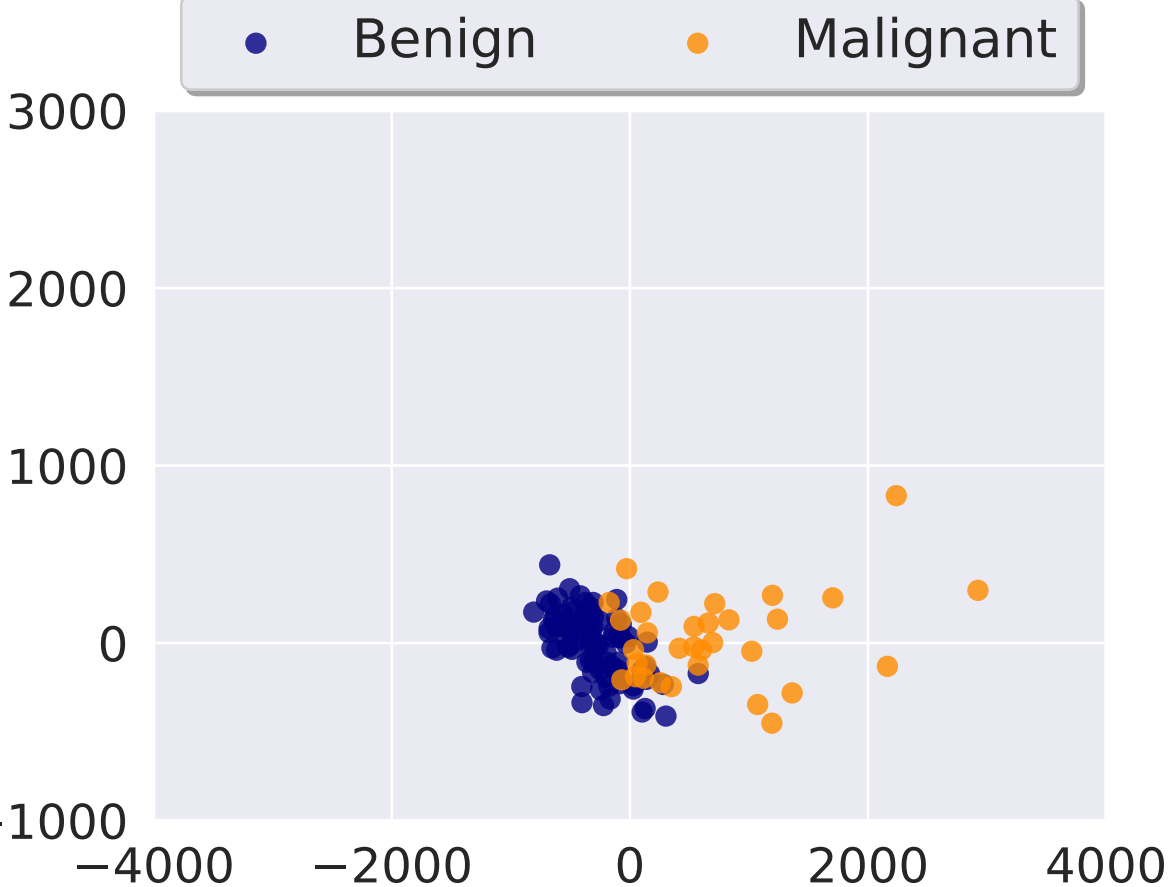

Supplement: Data_Sheet_1.zip [file PCA_selected_cols_2.5dB.pdf › Supplementary_Figures/PCA_selected_cols_2.5dB.pdf]

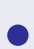

Benign

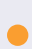

Malignant

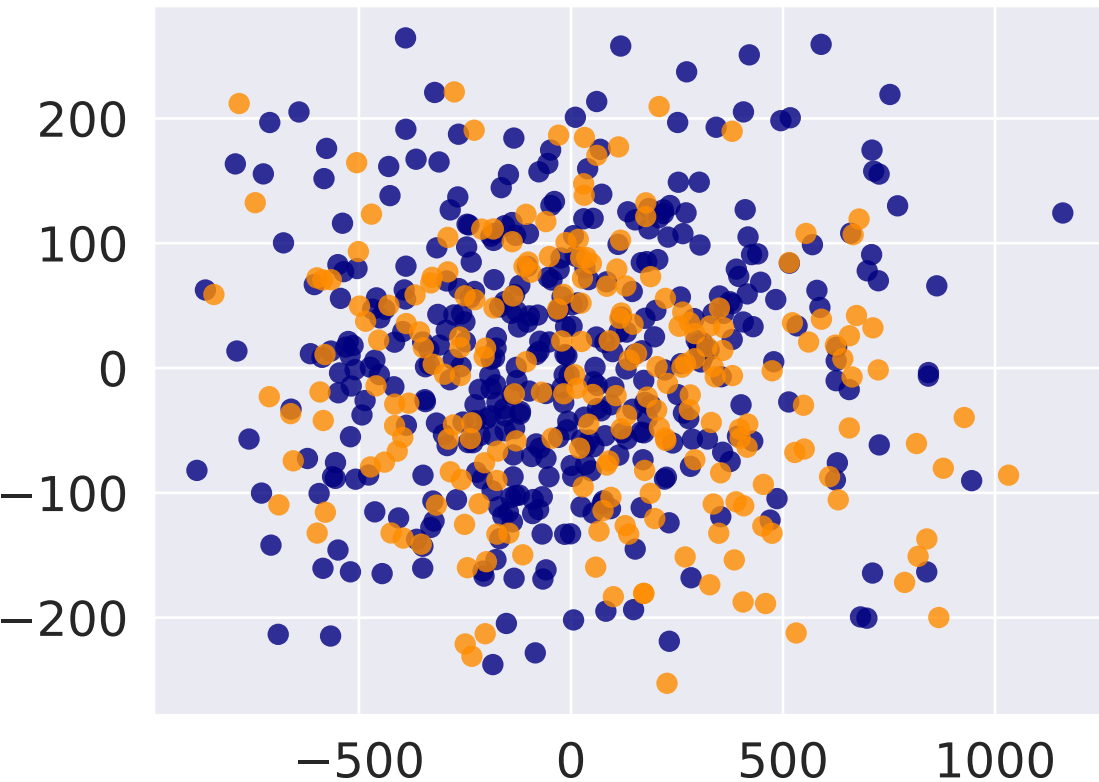

Supplement: Data_Sheet_1.zip [file PimaIndiansTraining_-10dB.pdf › Supplementary_Figures/PimaIndiansTraining_-10dB.pdf]

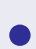

Benign

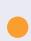

Malignant

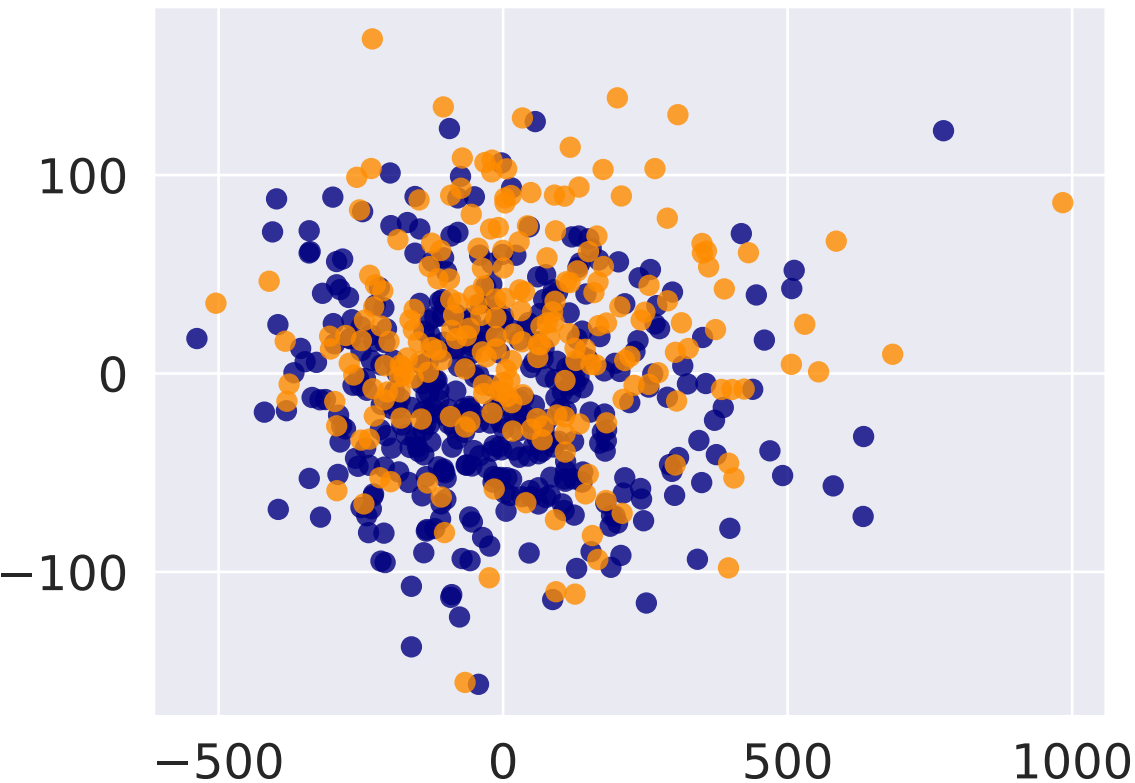

Supplement: Data_Sheet_1.zip [file PimaIndiansTraining_-2.5dB.pdf › Supplementary_Figures/PimaIndiansTraining_-2.5dB.pdf]

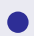

Benign

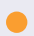

Malignant

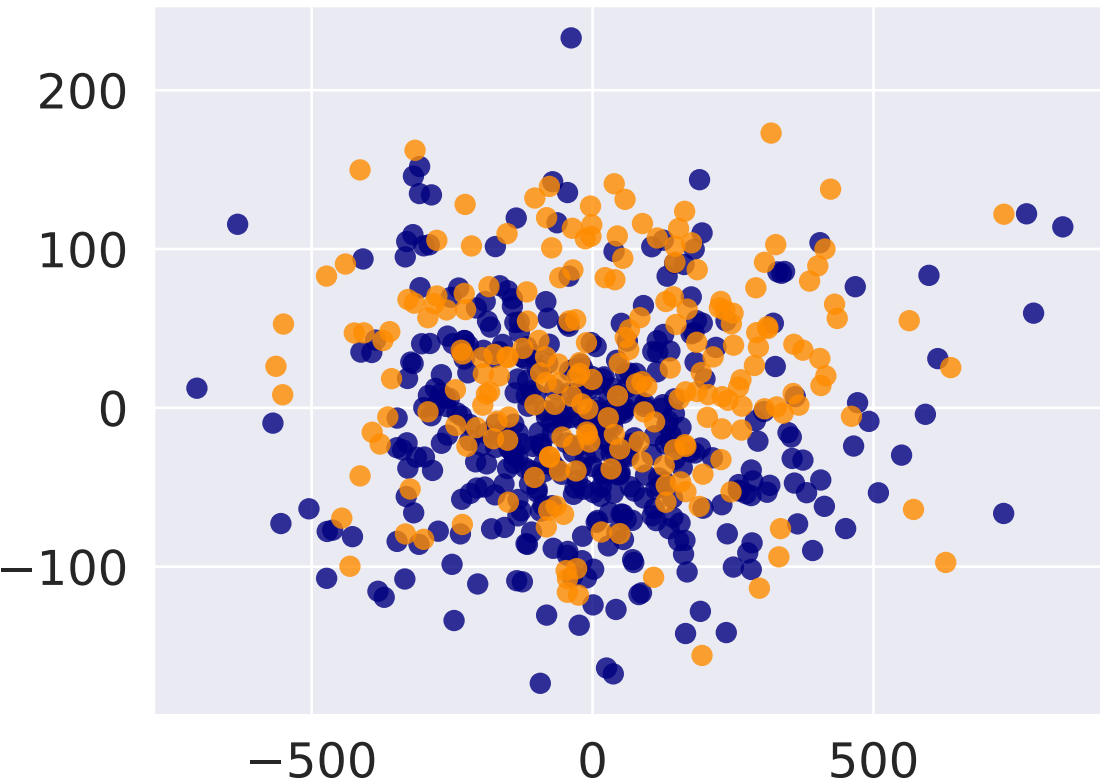

Supplement: Data_Sheet_1.zip [file PimaIndiansTraining_-5dB.pdf › Supplementary_Figures/PimaIndiansTraining_-5dB.pdf]



Benign



Malignant

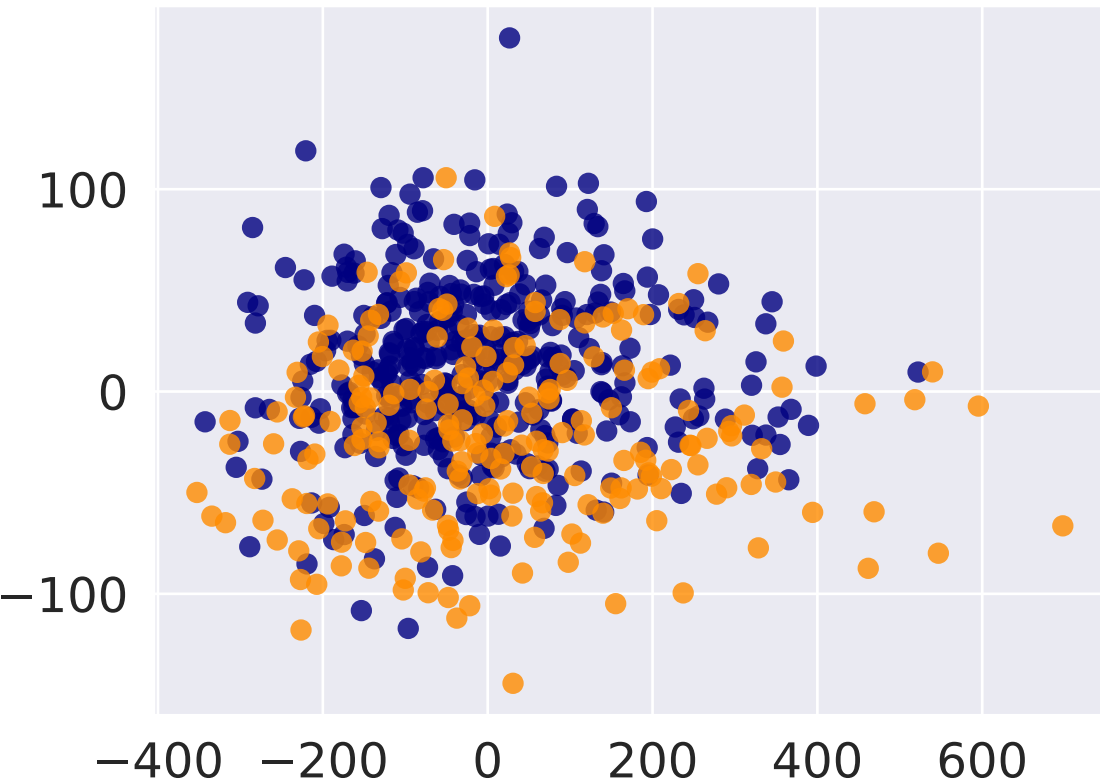

Supplement: Data_Sheet_1.zip [file PimaIndiansTraining_0dB.pdf › Supplementary_Figures/PimaIndiansTraining_0dB.pdf]



Benign

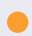

Malignant

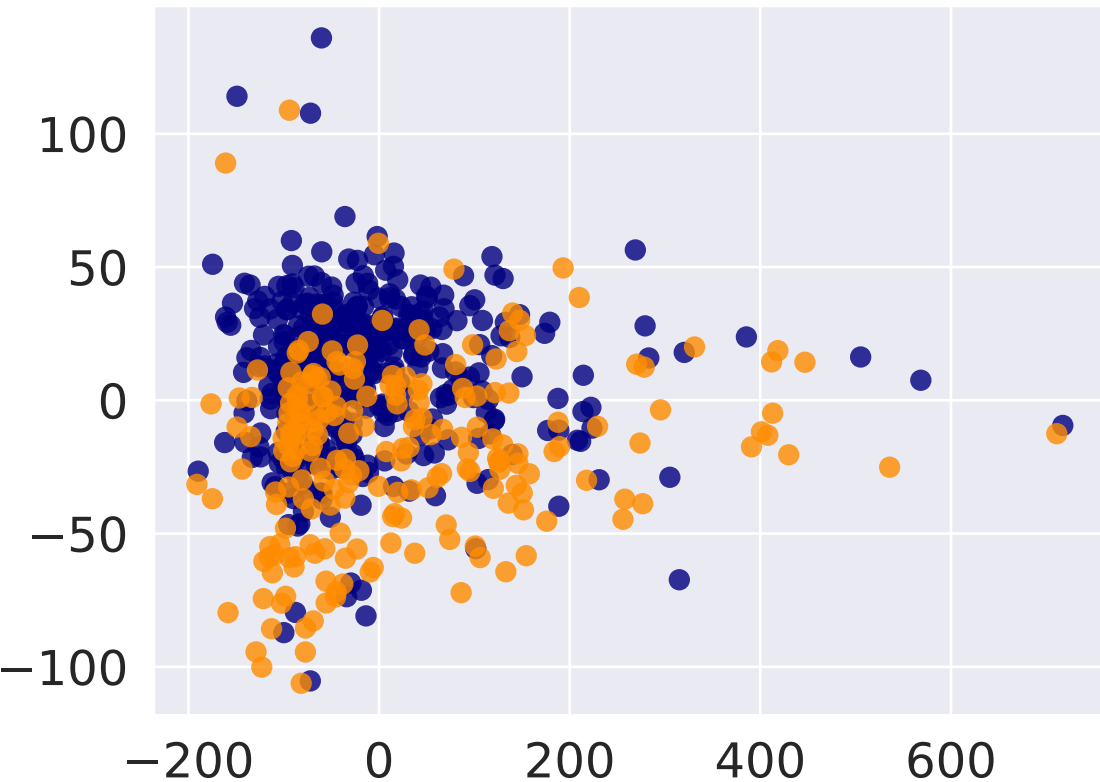

Supplement: Data_Sheet_1.zip [file PimaIndiansTraining_10dB.pdf › Supplementary_Figures/PimaIndiansTraining_10dB.pdf]



Benign



Malignant

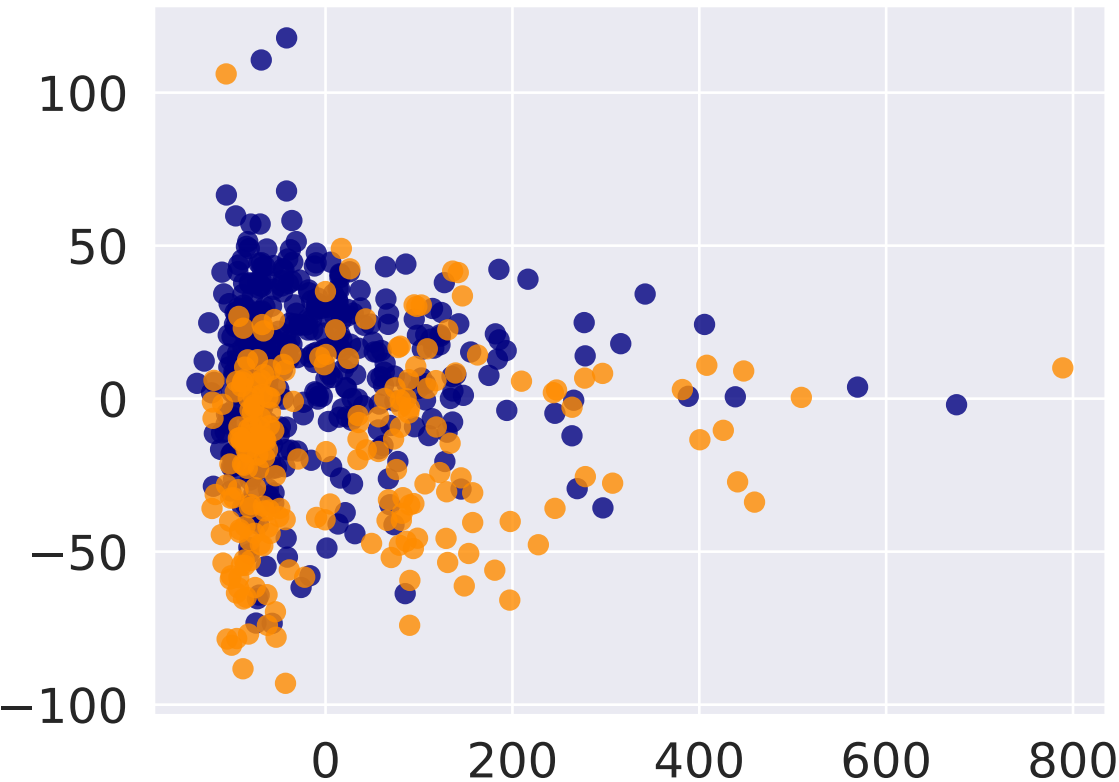

Supplement: Data_Sheet_1.zip [file PimaIndiansTraining_15dB.pdf › Supplementary_Figures/PimaIndiansTraining_15dB.pdf]
